# Supplementary material for: Effect of counter-anions on the aggregation of Thioflavin-T
Source: Royal Society of Chemistry journal article supplement (doi:10.1039/d1cp00193k), 2021-01-01
Supplement: d1cp00193k1.pdf [file d1cp00193k1.pdf]

## Supporting Information

# Effect of counter-anion on the aggregation of thioflavin-T

*Akshat M. Desai,<sup>a</sup> Shrishti P. Pandey,<sup>a,c</sup> and Prabhat K. Singh,<sup>a,b,\*</sup>*

<sup>a</sup>Radiation & Photochemistry Division, Bhabha Atomic Research Centre, Mumbai 400 085,

INDIA

<sup>b</sup>Homi Bhabha National Institute, Training School complex, Anushaktinagar, Mumbai 400 094,

INDIA

<sup>c</sup>Amity Institute of Biotechnology, Amity University, Mumbai-Pune Expressway, Bhatan,

Panvel, Mumbai, 410206, INDIA

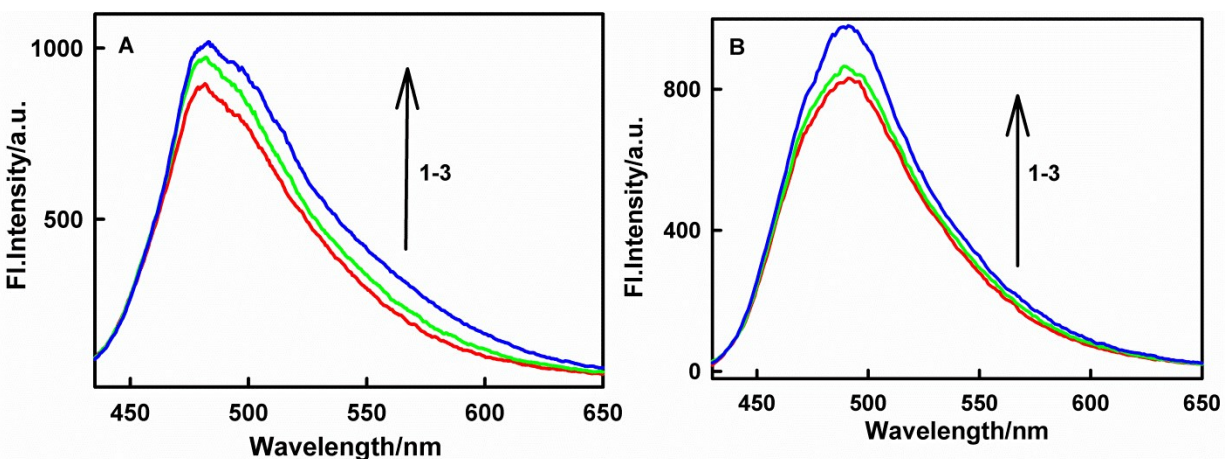

**Figure S1:** Steady-state fluorescence spectra of ThT at varying concentration of (A) NaCl and (B) NaCH<sub>3</sub>CO<sub>2</sub> (1) 0 M (2) 1.65 M (3) 3.3 M

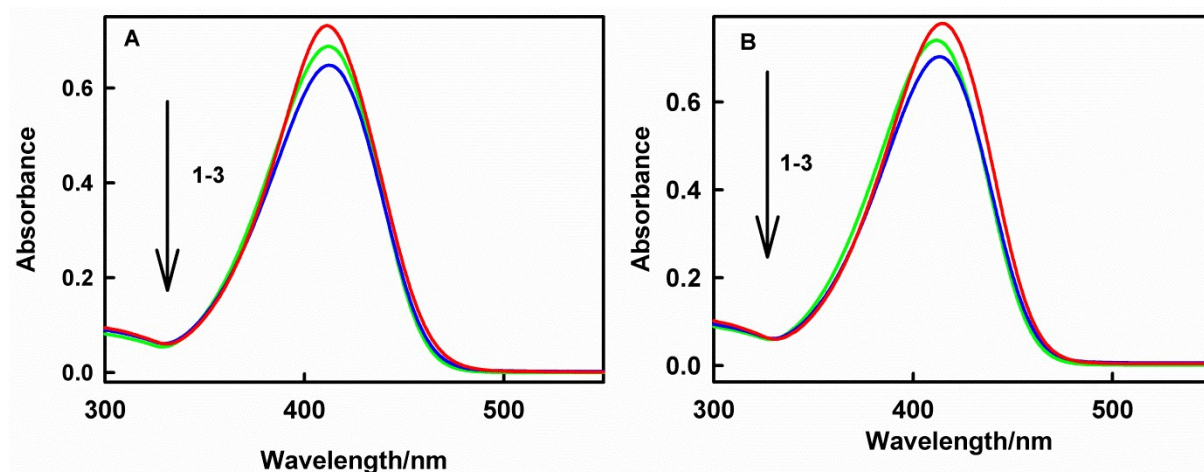

**Figure S2:** Ground-state absorption spectra of ThT at varying concentration of (A) NaCl and (B) NaCH<sub>3</sub>CO<sub>2</sub> (1) 0 M (2) 1.65 M (3) 3.3 M.

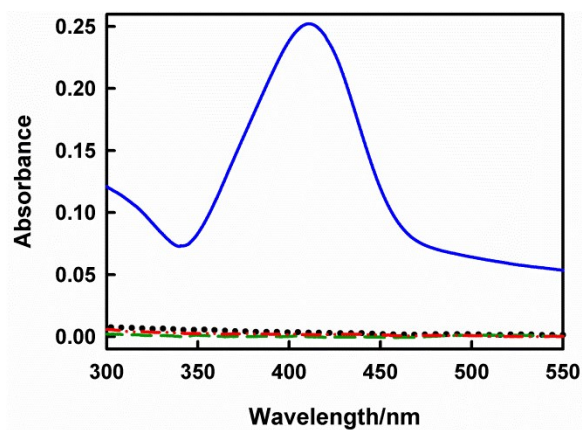

**Figure S3:** Ground-state absorption spectra of ThT- NaClO<sub>4</sub> system (solid blue line), only 0.5 M NaClO<sub>4</sub> in water (green dashed line), only 1 M NaClO<sub>4</sub> in water (red dash dot dot line). The black dotted line represents the baseline of water in absence of ThT or NaClO<sub>4</sub>.

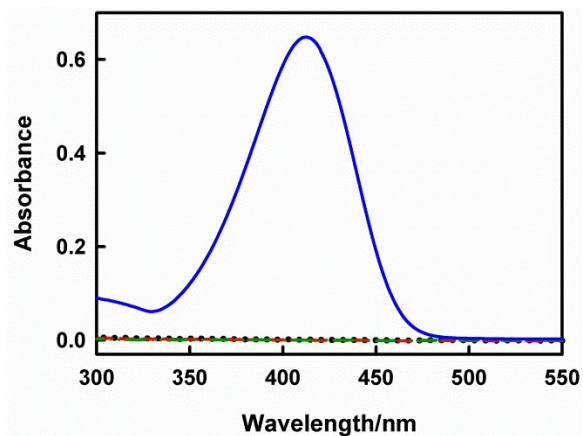

**Figure S4:** Ground-state absorption spectra of ThT- NaCl system (solid blue line), only 0.5 M NaCl in water (green dashed line), only 1 M NaCl in water (red dash dot dot line). The black dotted line represents the baseline of water in absence of ThT or NaCl.

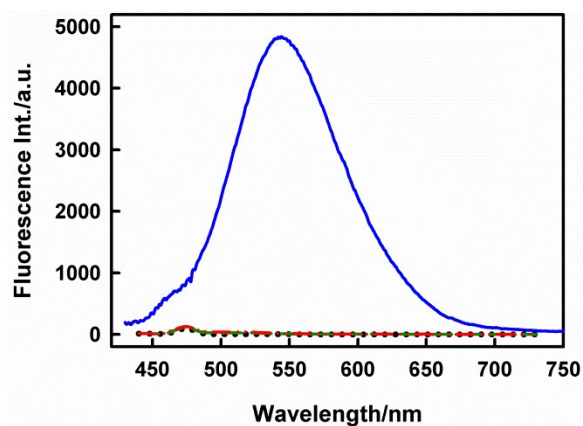

**Figure S5:** Steady-state emission spectra of ThT- NaClO<sub>4</sub> system (solid blue line), only 0.5 M NaClO<sub>4</sub> in water (green dashed line), only 1 M NaClO<sub>4</sub> in water (red dash dot dot line). The black dotted line represents the emission spectrum of water collected in absence of ThT or NaClO<sub>4</sub>.

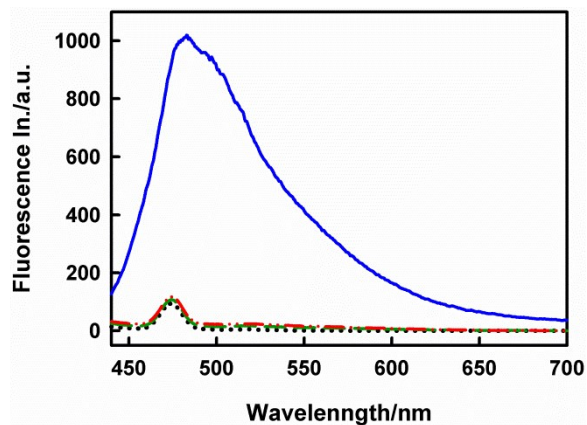

**Figure S6:** Steady-state emission spectra of ThT- NaCl system (solid blue line), only 0.5 M NaCl in water (green dashed line), only 1 M NaCl in water (red dash dot dot line). The black dotted line represents the emission spectrum of water collected in absence of ThT or NaCl.

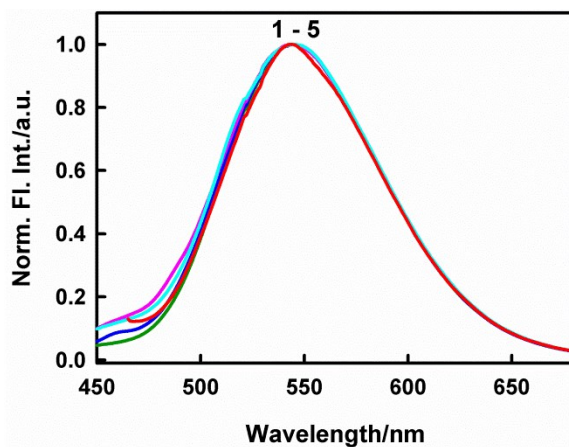

**Figure S7:** Normalized fluorescence spectra of ThT-NaClO<sub>4</sub> system at various excitation wavelengths (1) 390 nm (2) 410 nm (3) 430 nm (4) 450 nm (5) 470 nm.

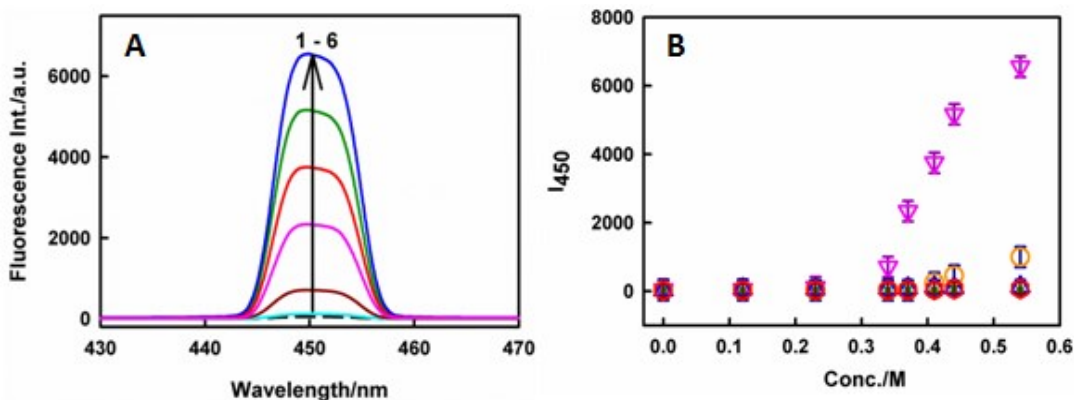

**Figure S8:** (A) Rayleigh's scatter plot of ThT ( $\lambda_{em} = 450$  nm) in the presence of various concentrations of NaClO<sub>4</sub> (in M) (1) 0.23 (2) 0.34 (3) 0.37 (4) 0.41 (5) 0.44 (6) 0.54. The dashed line represents the spectrum of ThT in water. (B) Variation in the Rayleigh scattering intensity in the presence of various concentrations of different salts (1) NaClO<sub>4</sub> (pink triangles) (2) NaBr (red circles) (3) NaCH<sub>3</sub>CO<sub>2</sub> (green squares) (4) NaCl (blue triangles) (5) NaBF<sub>4</sub> (orange circles).

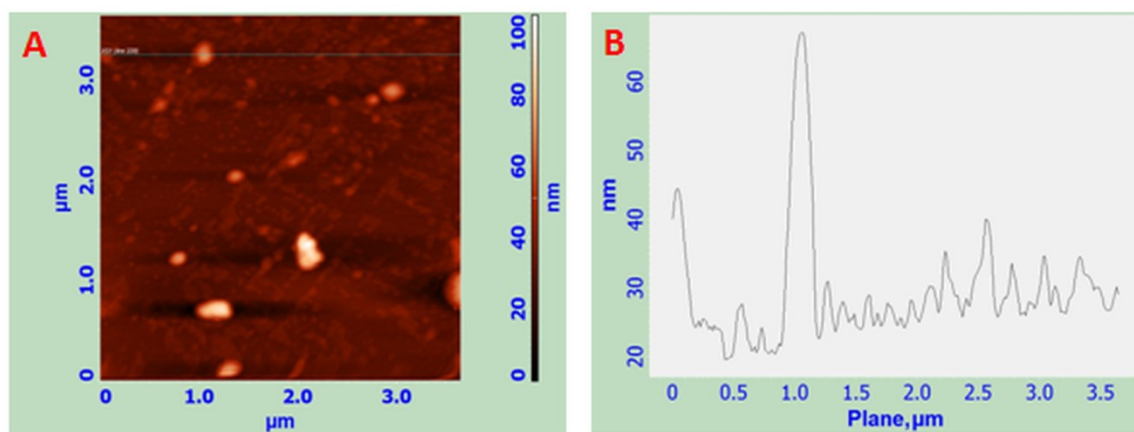

**Figure S9:** AFM images of ThT-perchlorate system

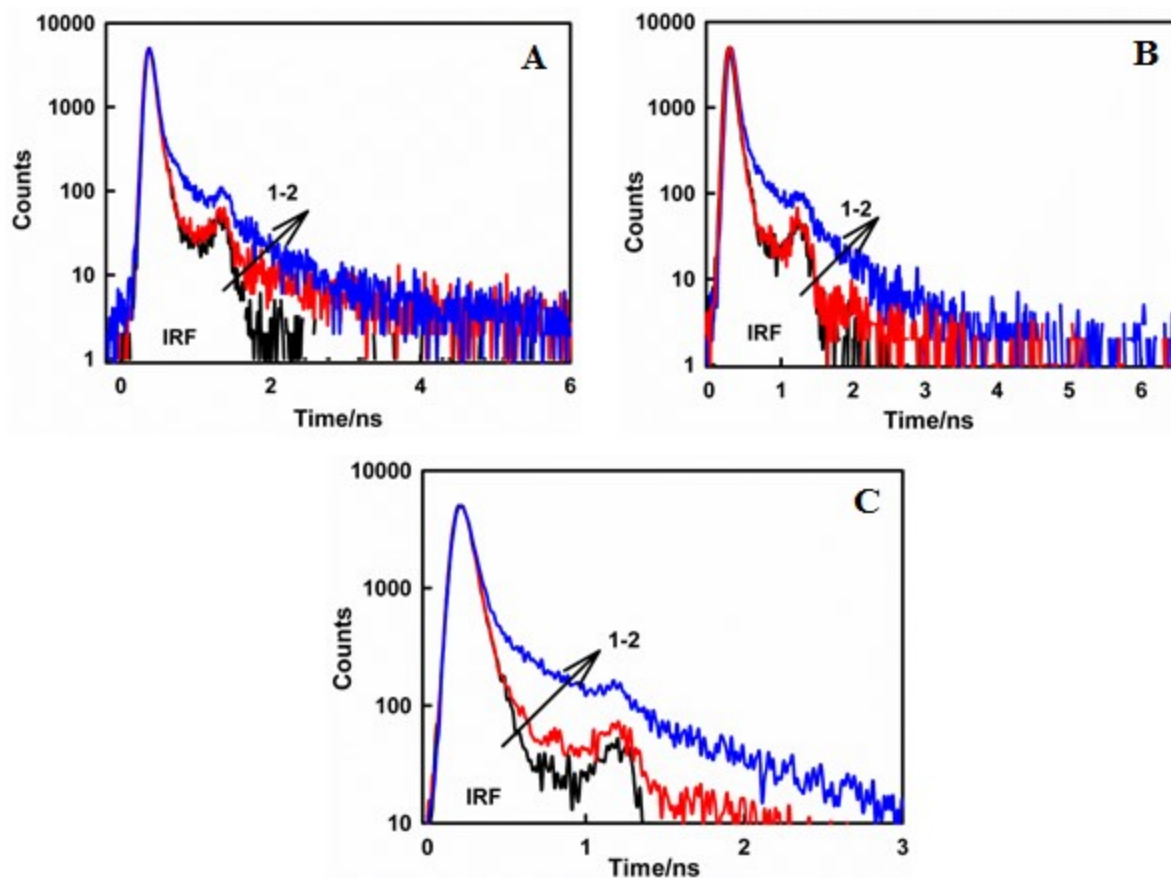

**Figure S10:** Transient decay trace for ThT in (A):NaCH<sub>3</sub>CO<sub>2</sub> (B):NaCl (C):NaBr (1.0 M ) at emission wavelengths ( $\lambda_{\text{ex}} = 410 \text{ nm}$ ): (1) 470 nm (2) 650 nm The solid black line represents instrument response function (IRF).

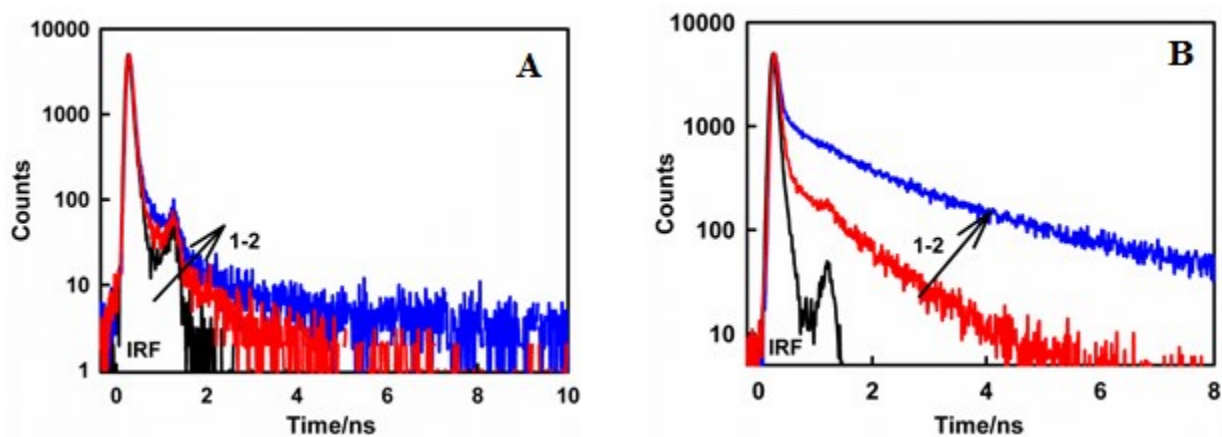

**Figure S11:** Transient decay traces for ThT in (A) NaI (B) NaBF<sub>4</sub> (1.0 M) at emission wavelengths ( $\lambda_{\text{ex}} = 410 \text{ nm}$ ): (1) 470 nm (2) 630 nm The solid black line represents instrument response function (IRF).

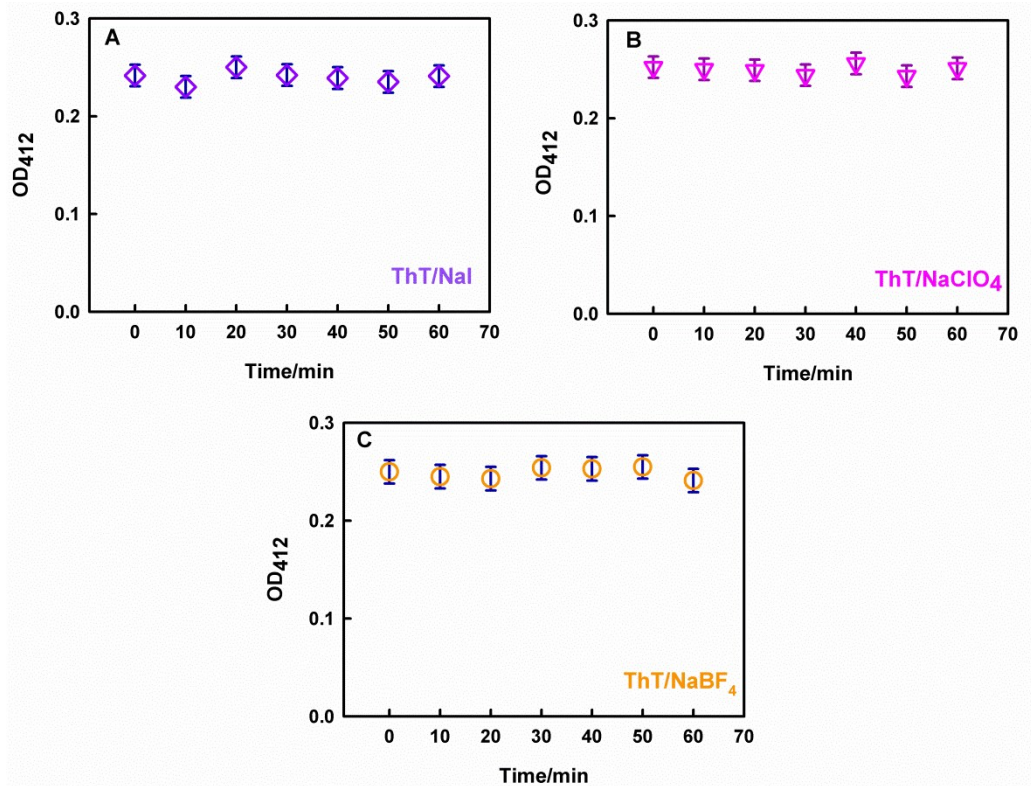

**Figure S12:** Variation in the OD of ThT (20  $\mu\text{M}$ ) at 412 nm as a function of time in the presence of (A) 0.8 M NaI (B) 1.1 M NaClO<sub>4</sub> (C) 4.8 M NaBF<sub>4</sub>.

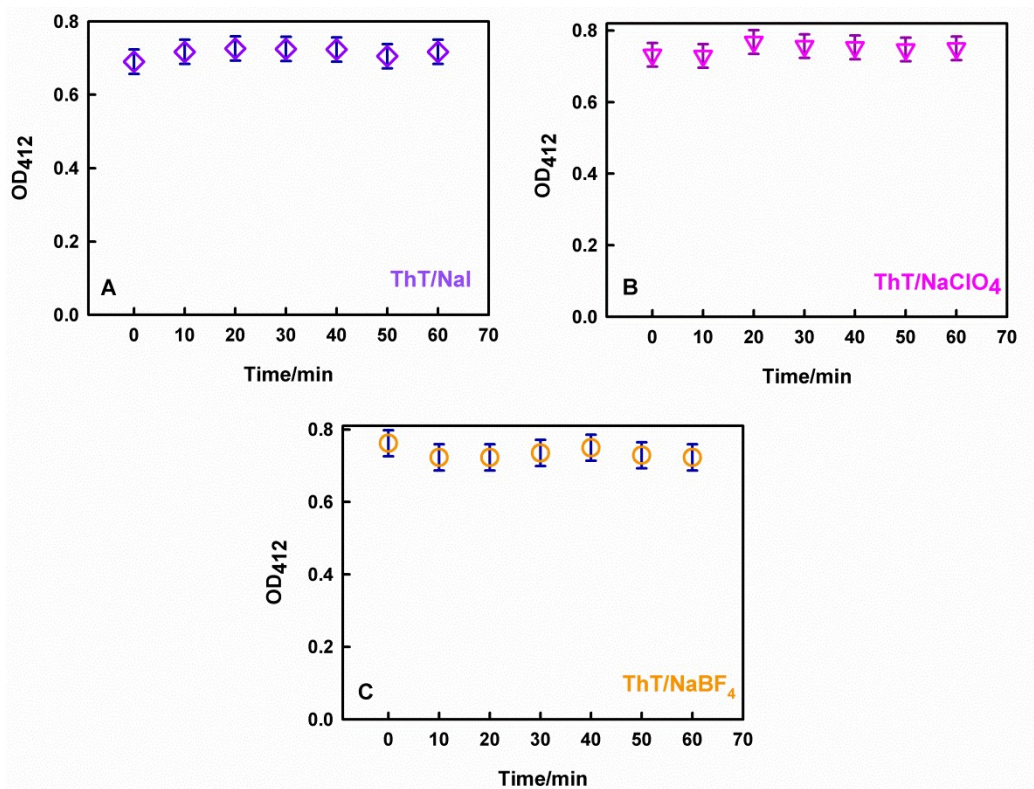

**Figure S13:** Variation in the OD of ThT (60  $\mu$ M) at 412 nm as a function of time in the presence of (A) 0.8 M NaI (B) 1.1 M NaClO<sub>4</sub> (C) 4.8 M NaBF<sub>4</sub>.

**Table T1:** Fitting parameters for transient decay trace of ThT-perchlorate system at different temperatures

| Temperature ( $^{\circ}$ C) | $a_1$ | $\tau_1$ /ns | $a_2$ | $\tau_2$ /ns | $a_3$ | $\tau_3$ /ns | $\chi^2$ |
|-----------------------------|-------|--------------|-------|--------------|-------|--------------|----------|
| 20                          | 0.138 | 0.028        | 0.368 | 0.65         | 0.494 | 1.40         | 1.08     |
| 25                          | 0.156 | 0.028        | 0.348 | 0.66         | 0.496 | 1.39         | 1.11     |
| 30                          | 0.191 | 0.027        | 0.418 | 0.72         | 0.391 | 1.42         | 1.09     |
| 35                          | 0.153 | 0.029        | 0.474 | 0.74         | 0.373 | 1.42         | 1.10     |
| 40                          | 0.214 | 0.027        | 0.494 | 0.81         | 0.292 | 1.44         | 1.06     |



|    |       |       |       |      |       |      |      |
|----|-------|-------|-------|------|-------|------|------|
| 45 | 0.305 | 0.028 | 0.452 | 0.84 | 0.243 | 1.42 | 1.05 |
| 50 | 0.375 | 0.030 | 0.401 | 0.87 | 0.224 | 1.42 | 1.04 |
| 55 | 0.475 | 0.027 | 0.363 | 0.91 | 0.162 | 1.42 | 1.06 |
